# Supplementary material for: A machine learning approach to explore the spectra intensity pattern of peptides using tandem mass spectrometry data
Source: PubMed Central journal article supplement (PMC2529326; doi:10.1186/1471-2105-9-325), 2008-07-30
Supplement: 1471-2105-9-325-S1.pdf [file 1471-2105-9-325-S1.pdf]

**Table 1 – Original Values of irrelevance score for all features:**

| <i>Abbreviation</i> | <i>Mobile</i> | <i>Partial</i> | <i>Nonmobile</i> | <i>Abbreviation</i> | <i>Mobile</i> | <i>Partial</i> | <i>Nonmobile</i> |
|---------------------|---------------|----------------|------------------|---------------------|---------------|----------------|------------------|
| RB_C                | 0.44          | 10.21          | 1.65             | HyRB_A              | 4.51          | 28.44          | 20.64            |
| RB_N                | 0.53          | 11.40          | 1.35             | HyRB_D              | 3.46          | 21.95          | 22.38            |
| DB_N                | 4.81          | 30.44          | 18.81            | HyYI                | 1.35          | 11.23          | 21.51            |
| DB_C                | 1.49          | 6.81           | 18.94            | HyP                 | 3.37          | 28.93          | 21.17            |
| DB_M                | 0.19          | 0.98           | 3.24             | PIRB_N              | 4.79          | 21.19          | 19.96            |
| B_E                 | 2.44          | 17.89          | 22.35            | PIRB_C              | 4.05          | 28.21          | 20.92            |
| BaRB_N              | 5.04          | 26.00          | 20.80            | PIRB_A              | 4.58          | 30.81          | 20.08            |
| BaRB_C              | 4.40          | 32.35          | 18.37            | PIRB_D              | 5.12          | 34.14          | 14.91            |
| BaRB_A              | 4.93          | 33.14          | 20.69            | LP                  | 1.68          | 10.16          | 12.81            |
| BaRB_D              | 4.93          | 26.02          | 22.90            | LYI                 | 1.44          | 6.93           | 19.15            |
| BaYI                | 1.46          | 8.14           | 20.52            | RLIP                | 0.56          | 2.04           | 17.90            |
| BaP                 | 1.75          | 9.26           | 13.25            | NBaR_P              | 3.67          | 15.79          | 18.97            |
| HeRB_N              | 3.40          | 23.61          | 19.47            | NBaR_YI             | 4.09          | 18.79          | 21.96            |
| HeRB_C              | 1.98          | 13.47          | 19.86            | MP                  | 2.02          | 5.25           | 12.93            |
| HeRB_A              | 3.60          | 19.05          | 20.60            | MYI                 | 1.11          | 4.26           | 20.25            |
| HeRB_D              | 3.42          | 22.25          | 22.17            | RMIP                | 0.65          | 3.02           | 16.32            |
| HyRB_N              | 2.70          | 15.04          | 20.85            | DBBa                | 2.82          | 24.68          | 22.87            |
| HyRB_C              | 2.70          | 17.07          | 19.43            |                     |               |                |                  |

The original values of irrelevance scores for all features are listed above. The higher a score, the less important the corresponding feature is. Features of no apparent significance to peptide fragmentation are indicated in green and are eliminated in experiment stage 2.
