# Supplementary material for: A machine learning approach to explore the spectra intensity pattern of peptides using tandem mass spectrometry data
Source: PubMed Central journal article supplement (PMC2529326; doi:10.1186/1471-2105-9-325), 2008-07-30
Supplement: 1471-2105-9-325-S2.pdf [file 1471-2105-9-325-S2.pdf]

**Figure 1 – Examples of spectra predicted by the Bayesian neural network model:**

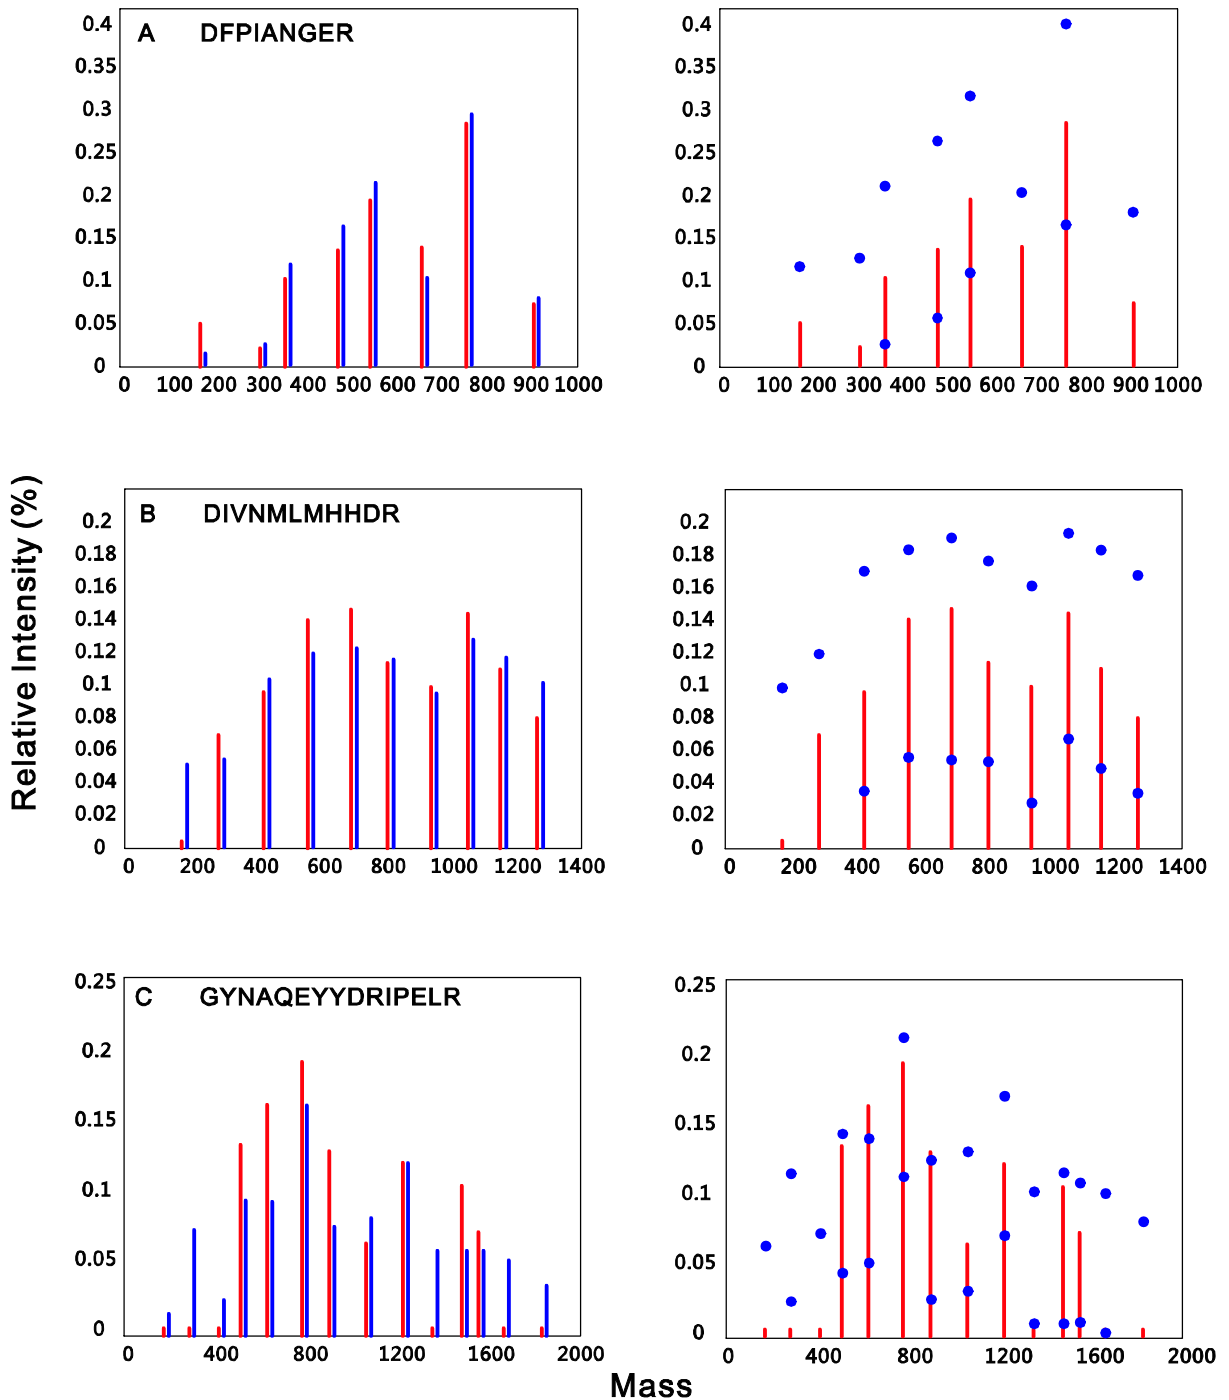

Figure 1-A: Mobile peptide with residue Asp and Pro. Similarity score: 9.32.

Figure 1-B: Partial-mobile peptide with Asp. Similarity score: 8.19.

Figure 1-C: Non-mobile peptide with Asp and Pro. Similarity score: 14.64.

Experimental spectra are log-transformed and indicated in red. Predicted spectra are indicated in blue. Both types of spectra are subject to total ion current normalization.

Blue dots indicate the interval [mean intensity – SD, mean intensity + SD] within which intensities of the ions are supposed to lie.
